1 **Muropeptides Stimulate Growth Resumption from Stationary**  
2 **Phase in *Escherichia coli***

3

4 Arvi Jõers<sup>1\*</sup>, Kristiina Vind<sup>1</sup>, Sara B. Hernández<sup>2</sup>, Regina Maruste<sup>1</sup>, Marta Pereira<sup>1</sup>,  
5 Age Brauer<sup>3</sup>, Mairo Remm<sup>3</sup>, Felipe Cava<sup>2</sup>, Tanel Tenson<sup>1</sup>

6

7 <sup>1</sup>Institute of Technology, University of Tartu, Estonia

8

9 <sup>2</sup>Department of Molecular Biology, Laboratory for Molecular Infection Medicine  
10 Sweden, Umeå University, Sweden

11

12 <sup>3</sup>Institute of Molecular and Cell Biology, University of Tartu, Estonia

13

14

15 \*Address correspondence to Arvi Jõers, [arvi.joers@ut.ee](mailto:arvi.joers@ut.ee)

16

17

18

19 **Abstract**

20

21 When nutrients run out, bacteria enter a dormant metabolic state. This low or  
22 undetectable metabolic activity helps bacteria to preserve their scant reserves  
23 for future, but also diminishes their ability to trace the environment for new  
24 growth-promoting substrates. However, neighboring microbial growth is a sure  
25 indicator of favorable environment and thus, can serve as a cue for exiting the  
26 dormancy. Here we report that for *Escherichia coli* this cue is the basic  
27 peptidoglycan unit (i.e. muropeptide). We show that several forms of  
28 muropeptides can stimulate growth resumption of dormant *E. coli* cells, but the  
29 sugar – peptide bond is crucial for activity. We also demonstrate that  
30 muropeptides from several different species can induce growth resumption of *E.*  
31 *coli* and also *Pseudomonas aeruginosa*. These results, together with the previous  
32 identification of muropeptides as germination signal for bacterial spores, makes  
33 muropeptides rather universal cue for bacterial growth.

34

35

## 36 Introduction

37

38 Free-living bacteria can encounter large fluctuations in environmental  
39 conditions such as those transitioning from nutrient abundance and scarcity, i.e.  
40 feast and famine cycle. When growth substrates are exhausted, bacteria initiate  
41 specific developmental programs that prepare them for long period of dormancy.  
42 Many Gram-positive bacteria form spores that are very resilient to adverse  
43 conditions and can survive hundreds of years<sup>1</sup>. Gram-negatives' morphological  
44 transition associated with the development of dormant cells is, in general, less  
45 drastic, but changes do occur.

46

47 Gram-negative bacteria undergo large changes in their gene expression pattern  
48 and metabolism when entering stationary phase<sup>2</sup>. These changes are largely  
49 governed by the alarmone (p)ppGpp that changes transcription of many genes,  
50 reducing growth-oriented gene expression and increasing survival-oriented one  
51<sup>3,4,5</sup>. Ribosome synthesis is decreased and later inactive 100S ribosomal particles  
52 are formed. DNA replication is also inhibited. At the end of these changes cells  
53 are entering dormant state, ready to withstand long period without nutrients.

54

55 Much less is known about recovery from dormancy when nutrients become  
56 available again. It is now clear that cells display considerable phenotypic  
57 heterogeneity in timing of recovery – in clonal population some cells start  
58 growing rather quickly while others stay dormant for longer and initiate growth  
59 only later<sup>6,7</sup>. The growth resumption timing has been suggested to rely on  
60 stochastic process, but some reports also describe different states of dormancy  
61 (shallow and deep dormancy) and suggest that growth resumption from shallow  
62 dormancy is quicker<sup>8,9</sup>. We have shown that the order of cells resuming growth  
63 in some conditions is determined by the order they enter stationary phase,  
64 indicating a long-term memory effect in *E. coli*<sup>10</sup>.

65

66 Persisters are antibiotic tolerant cells in generally antibiotic sensitive bacterial  
67 population<sup>11</sup>. Consensus is now emerging that persisters are mostly non-  
68 dividing cells and survive antibiotics due to their inactivity (Balaban et al.,  
69 manuscript submitted to Nature Reviews Microbiology). They only recover from  
70 dormancy and start to grow after a long lag phase and by then antibiotic is  
71 usually removed. Given that persisters are held responsible for several recurrent  
72 infections<sup>12,13</sup> it is important to understand the mechanisms that govern the  
73 growth resumption process.

74

75 The speed of growth resumption can be influenced by the environment. *E. coli*  
76 recovery from stationary phase is quicker in rich medium, leading to fewer  
77 antibiotic tolerant cells<sup>6</sup>. Slow recovery in the presence of non-optimal carbon  
78 source can be accelerated by small amount of glucose that probably acts as a  
79 signal rather than a nutrient<sup>10</sup>. In *Micrococcus luteus* growing cells secrete an Rpf  
80 protein that can induce growth resumption of dormant cells<sup>14</sup> and dormant  
81 *Staphylococcus aureus* cells can be resuscitated with the help of spent culture  
82 supernatant<sup>15</sup>. *Bacillus* spores are able to detect nutrients and other molecules  
83 through specific receptors and initiate germination in response<sup>16,17</sup>. Here we  
84 describe a growth resumption signal for *E. coli* consisting of muropeptides. These

85 molecules are produced by actively growing cells thereby stimulating growth  
86 resumption of cells still in dormancy. Moreover, *E. coli* cells are able to resume  
87 growth also in response to muropeptides from other species and so are dormant  
88 *Pseudomonas aeruginosa* cells, indicating their role in interspecies signaling. We  
89 describe the structural requirements for muropeptide activity and isolate  
90 mutants with altered sensitivity to muropeptides.

91

## 92 **Results**

93

### 94 Dividing cells secrete a growth resumption promoting factor

95

96 During our studies on growth resumption heterogeneity<sup>10</sup> we speculated that  
97 growing cells produce a signal that stimulates the growth resumption of still  
98 non-growing cells. To directly test this hypothesis we prepared a conditioned  
99 medium and tested its effect on cells resuming growth from stationary phase.  
100 Stationary phase cells were washed and resuspended in fresh medium. Half of  
101 the culture was immediately centrifuged and supernatant was sterilized by  
102 filtration to be used as control medium for comparisons. The other half was  
103 grown until the middle exponential phase and used for preparation of  
104 conditioned medium. This conditioned medium still had enough substrates to  
105 support growth and also contained factors secreted by growing cells.  
106 We took the cells again from stationary phase and compared their growth  
107 resumption in fresh, control and conditioned medium. At first we used our  
108 single-cell growth resumption assay<sup>10</sup> where cells, carrying two plasmids  
109 encoding for fluorescent proteins GFP and Crimson, are grown into stationary  
110 phase with Crimson expression induced. After that the Crimson inducer is  
111 removed and a fresh carbon source is added together with GFP inducer. Cells  
112 that resume growth, manifested by active protein synthesis, initially become  
113 GFP-positive and later dilute Crimson by cell division (Figure 1a). GFP-positive  
114 cells accumulate clearly quicker in conditioned medium. The same effect is  
115 evident when optical density of different cultures is compared – lag phase is  
116 shorter in conditioned medium (Figure 1b).

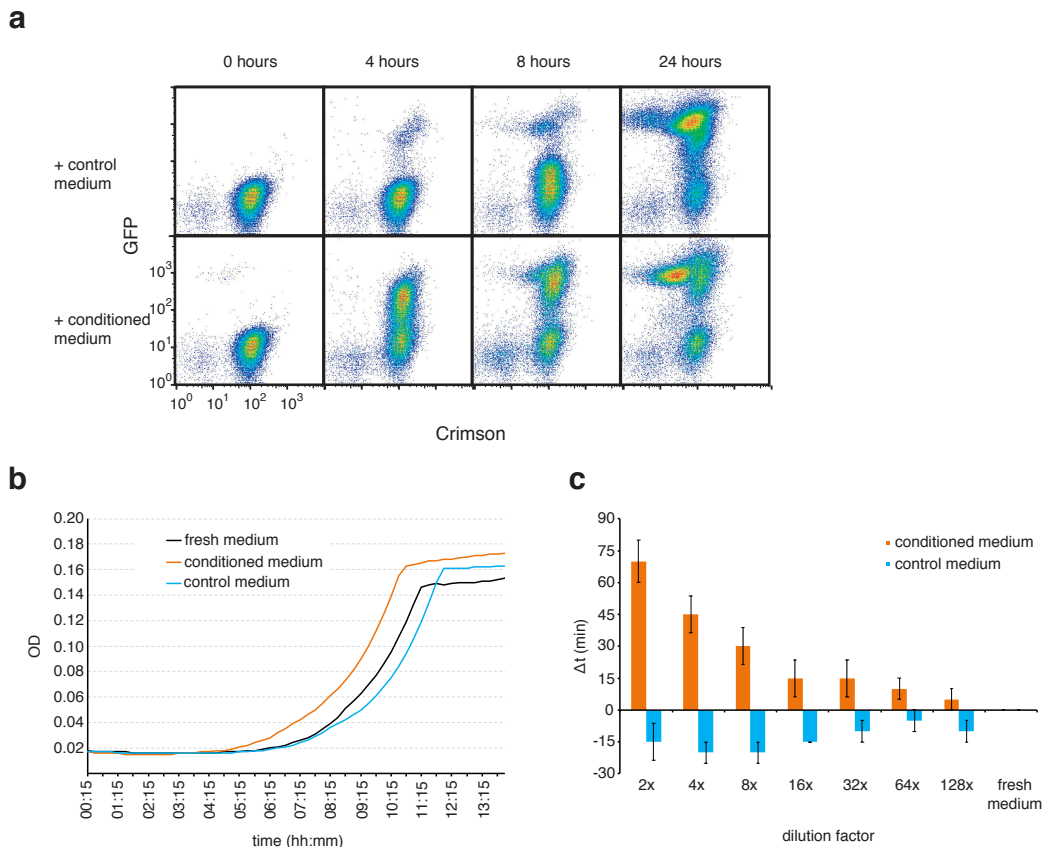

117  
118 **Figure 1. Conditioned medium stimulates growth resumption of**  
119 **stationary phase *E. coli*.** **a.** Stationary phase cells were resuspended either in  
120 conditioned medium or control medium and GFP expression was induced.  
121 Growth resuming cells are GFP-positive and dividing cells have reduced  
122 Crimson content due to the dilution by cell division. **b.** Stationary phase cells  
123 were diluted into fresh medium, and fresh medium mixed with conditioned  
124 medium or control medium. Cells were grown in 96-well plate and OD was  
125 measured in every 15 minutes. Cells exposed to conditioned medium resume  
126 growth earlier than cells in fresh medium. **c.** Quantification of results in panel  
127 b.  $\Delta t$ , the time difference (in minutes) of reaching OD 0.06 (actual reading for  
128 100 $\mu$ l culture) between test medium and fresh medium was calculated.  
129 Dilution factor indicates how many times the tested medium was diluted in  
130 fresh medium. The average of three independent experiments are shown,  
131 error bars indicate standard error of the mean.

132  
133  
134  
135  
136  
137  
138  
139  
140  
141  
142

Compared to fresh medium, growth resumption is slightly inhibited in control medium. This is probably due to some inhibitory compounds carried over by stationary phase cells (see above how the control medium is made). At the same time the growth rate in exponential phase was the same for all the cultures, indicating that only the growth resumption was affected. For quantification we compared the time it took for different cultures to reach an OD 0.06 (measured OD value for 100  $\mu$ l culture on 96-well plate, chosen to be approximately in the middle of exponential phase) and calculated the difference between conditioned (or control) medium and the culture grown in fresh medium ( $\Delta t$ ). The growth stimulatory effect of conditioned medium was concentration dependent and still

143 clearly detectable when diluted several times (Figure 1c). These results  
144 demonstrate that conditioned medium has a growth resumption promoting  
145 activity.

146

#### 147 Cell wall derived muropeptides induce growth resumption

148

149 We tried to purify this activity from conditioned supernatant, but failed to get  
150 enough pure material for identification. However, during this process we learned  
151 that the molecule facilitating growth has relatively low molecular weight and is  
152 hydrophilic, but not strongly charged. Cell wall derived muropeptides (MPs) fit  
153 this description and can induce spore germination in *Bacillus*<sup>17</sup>, so we tested if  
154 MPs can also stimulate growth resumption in *E. coli*.

155 We purified peptidoglycan (PG) from growing *E. coli* cells as described before<sup>17</sup>  
156 and digested it with mutanolysin to get individual MPs, consisting of a  
157 disaccharide (N-acetyl-glucosamine linked to N-acetyl muramic acid) and a short  
158 peptide bound to muramic acid (Figure 2a). When added to fresh medium  
159 solubilized MPs have a growth resumption promoting activity whereas  
160 undigested PG has not (Figure 2b).

161

162 In order to allow cell enlargement, peptidoglycan hydrolases cleave the PG  
163 sacculus during cell growth generating PG fragments. Released MPs are usually  
164 recovered – both Gram-positive and Gram-negative bacteria have MP recycling  
165 systems that transport PG fragments back to cytoplasm where they can be re-  
166 used<sup>18,19</sup>. However, some MPs escape the transport system and are released to  
167 growth environment. We analyzed if there are MPs in our conditioned medium.  
168 For this, fresh and conditioned medium was concentrated and subjected to  
169 UPLC-MS<sup>e</sup> analysis. We detected anhydro disaccharide with tri-, tetra-, or  
170 pentapeptide in conditioned medium, but not in control (fresh) medium (Figure  
171 2c). This is in line with previous results<sup>20</sup> and further supports our hypothesis  
172 that MPs act as a growth resumption signal in conditioned medium.

173

174 It is necessary to notice that the effect of MPs is evident only when the lag phase  
175 is long enough. Longer stationary phase, good aeration during the stationary  
176 phase and “non-optimal” carbon source in the growth resumption medium all  
177 prolong the lag phase and expose the effect of MPs. When stationary phase cells  
178 are resuspended in favorable media (LB or MOPS glucose), all cells resume  
179 growth quickly and the effect of MPs is not detectable on this background.

180

a

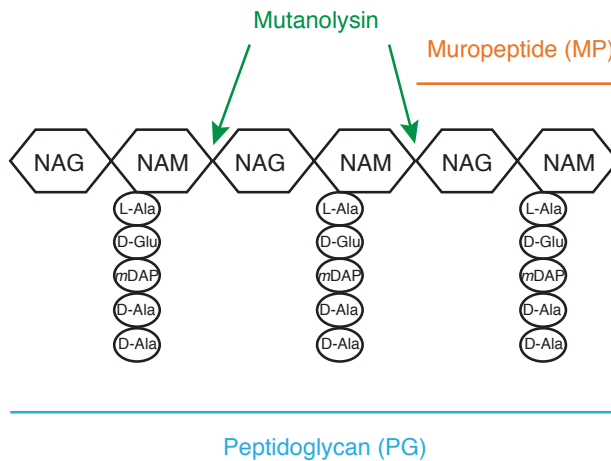

b

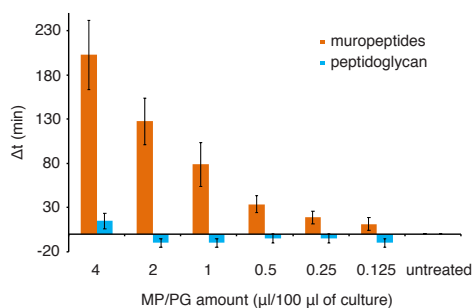

c

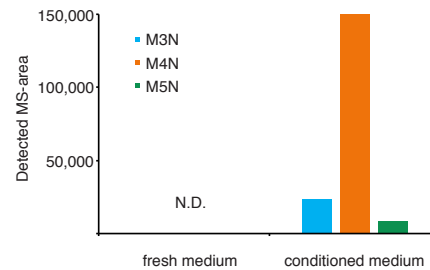

181

182

183 **Figure 2. Muropeptides stimulate growth resumption of *E. coli*.**

184 Schematic representation of peptidoglycan and muropeptide. NAG – N-acetyl-  
 185 glucosamine, NAM – N-acetyl-muramic acid. **b.** Muropeptides (MP) but not  
 186 peptidoglycan (PG) can stimulate growth resumption of stationary phase cells  
 187 in fresh medium. Different amounts of MP or PG were added to recovering  
 188 cells and the  $\Delta t$  was calculated. The average and standard error of the mean of  
 189 four independent experiments are shown. **c.** Different MP variants can be  
 190 detected from conditioned medium, but not from fresh medium, using mass-  
 191 spectrometry. M4N – anhydromuro-tetrapeptide, M3N – anhydromuro-  
 192 tripeptide, M5N – anhydromuro-pentapeptide, N.D. – not detected. The shown  
 193 values are an average of two technical replicates.

194

195 Bacterial PG is quite well conserved across different taxa and its basic structure  
 196 is same in most of the species<sup>21</sup>. It is thus reasonable to assume that *E. coli*  
 197 growth resumption could also be stimulated by MPs from other species. One  
 198 noticeable difference between the PG composition from Gram negatives and  
 199 some Gram positives is the amino acid present at the third position of the  
 200 peptide stem: Gram negatives, including *E. coli*, usually have *meso*-  
 201 diaminopimelic acid (*mDAP*) in that position, while most Gram positives contain  
 202 L-lysine (*Lys*)<sup>21</sup>. We prepared MPs from Gram positive bacteria *Enterococcus*  
 203 *faecalis* (contain *Lys*) and *Bacillus subtilis* (contain *mDAP*) and also from Gram  
 204 negative *Pseudomonas aeruginosa* (contain *mDAP*). It turned out that soluble  
 205 MPs, but not PG, from all these species can promote growth resumption of *E. coli*



206 cells (Figure 3a). Furthermore, all these MPs were also able to promote growth  
207 resumption of *P. aeruginosa* (Figure 3b). This, together with a fact that  
208 conditioned medium from *E. coli* can induce *B. subtilis* spore germination<sup>17</sup>,  
209 indicates that MPs are universal inducers of growth resumption across many  
210 bacterial species.  
211

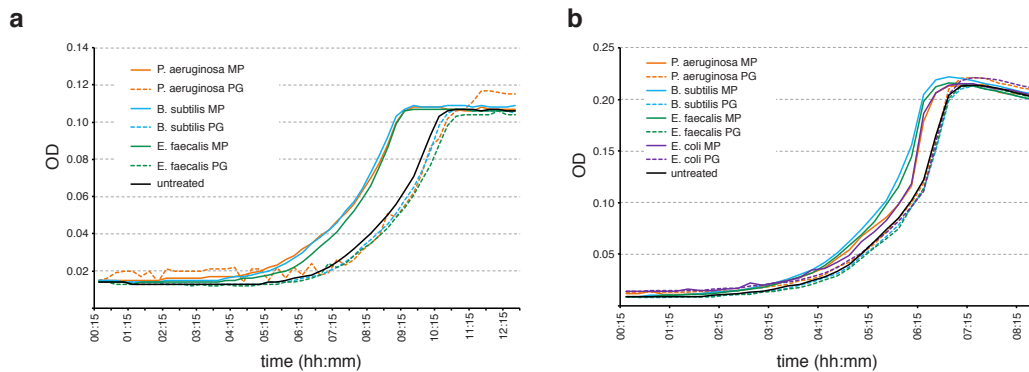

212  
213  
214  
215  
216  
217  
218  
219

**Figure 3. Cross-species recognition of muropeptides as growth resumption stimulators.** **a.** Muropeptides from different species stimulate growth resumption of *E. coli* cells. **b.** Muropeptides from different species stimulate growth resumption of *P. aeruginosa* cells. Representative result of at least three independent experiments is shown.

220 Sugar-peptide bond of muropeptides is crucial for induction of growth  
221 resumption.

222

223 Digesting PG with mutanolysin results in a mixture of non-crosslinked  
224 (monomers) and crosslinked (e.g. dimers and trimers) MPs that can vary in their  
225 peptide stem length and composition<sup>22</sup>. In addition, such a preparation may  
226 contain remnants of lipids and proteins associated with PG. To get a better  
227 understanding of the activity of different MP variants we purified well-defined  
228 structures from the MP mixture and tested their growth resumption properties.  
229 Several structures are active in growth resumption assay (Figure 4).  
230 Disaccharides with peptides containing 4, 3 or 2 amino acids are all capable of  
231 promoting growth resumption and anhydro forms tend to be more active than  
232 their hydrogenated counterparts. Even monosaccharide N-acetyl-muramic acid  
233 attached to 4 amino acid peptide (anhydro-muramyl-tetrapeptide) can stimulate  
234 growth resumption. In contrast, N-acetyl-muramic acid alone or tripeptide alone  
235 did not show any growth resumption promoting activity. This indicates that the  
236 linkage between sugar and peptide is crucial for the growth resumption activity  
237 and if this is present, cells can respond to several MP variants.  
238



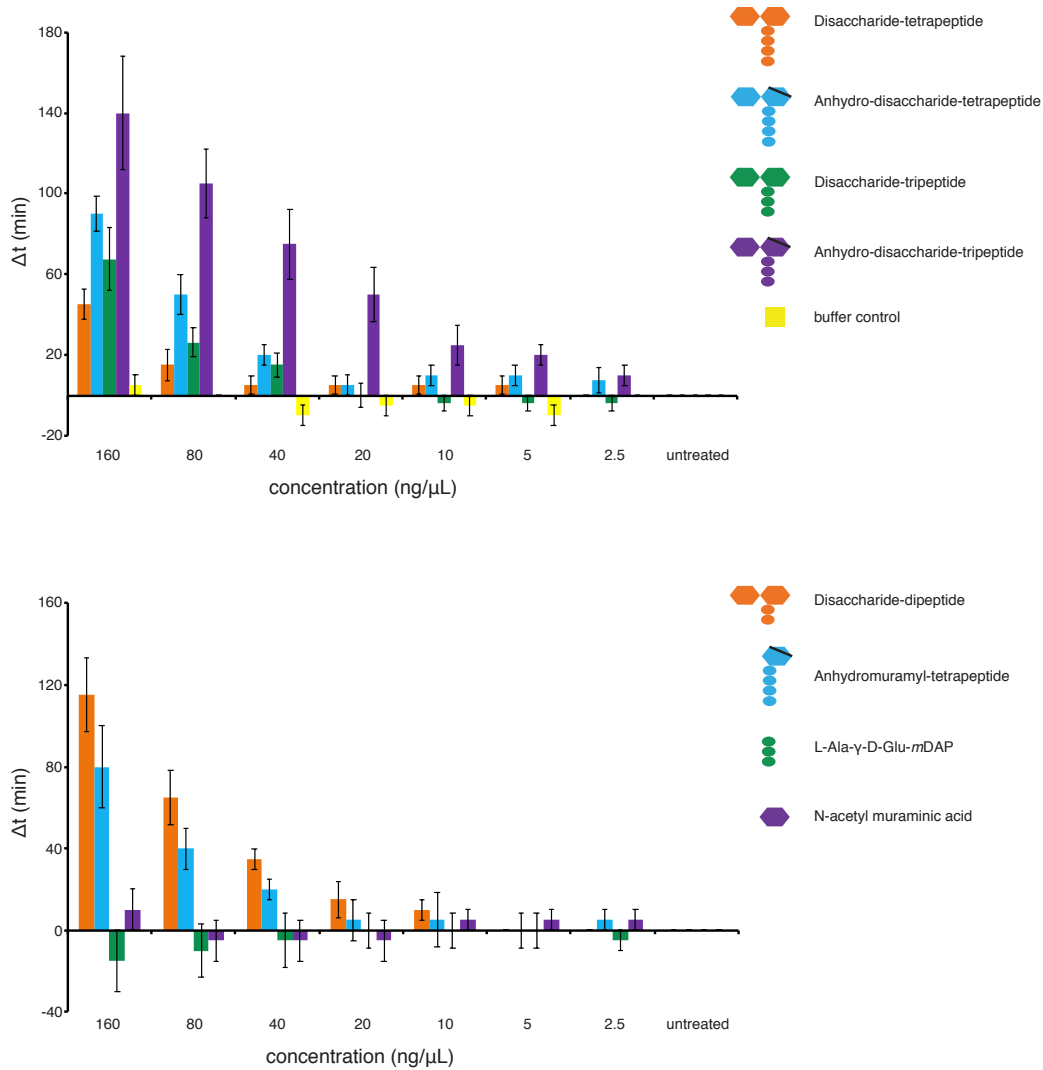

239

240

241 **Figure 4. Sugar – peptide bond is crucial for the MP growth resumption**

242 **activity.** Different MP variants were purified and tested on growth

243 resumption assay. Structures with intact sugar-peptide bond can stimulate

244 growth resumption, but NAM or tripeptide alone cannot. The average of three

245 independent biological replicates is shown, error bars indicate standard error

246 of the mean.

247

248

249 Muropeptide detection by the cells

250

251 *E. coli* has a well-described MP recycling system that imports, degrades and

252 recycles anhydromuropeptides released during cell growth<sup>18</sup>. The genes

253 responsible include *ampG* (permease), *ampD* (amidase), *nagZ* (N-

254 acetylglucosaminidase), *mpaA* ( $\gamma$ -D-Glu-DAP amidase) and *nagB* (glucosamine-6-

255 phosphate deaminase). We expected this system to be responsible also for

256 facilitating MP signaling during growth resumption. However, none of the single

257 knockout strains of genes mentioned above had any phenotype in growth

258 resumption assay and all were responding to MP stimulation like wt (data not

259 shown). This suggests that the primary MP signaling receptor is located either on  
260 cell surface or in periplasmic space.  
261 In the case of *Bacillus* spores, MPs are detected through eukaryotic-like protein  
262 kinase PrkC<sup>17</sup>. This gene family is, however, absent in *E. coli*. It is therefore clear  
263 that some new pathway for MP detection must be involved in Gram negatives.  
264 In order to identify a putative signaling pathway we carried out a genetic screen  
265 to find mutants resuming growth relatively slowly in the presence of MPs, but  
266 with normal speed in the absence of MPs (see material and methods for details).  
267 As a result we identified a clone (BW1.3) whose response to MPs has changed  
268 (Figure 5a). BW1.3 cells are more sensitive to MPs at lower concentrations and  
269 display a non-monotonous concentration dependency. We sequenced the  
270 genome of BW1.3 and identified 2 mutations that result in amino acid changes in  
271 two different proteins. In *rpoA* gene, which encodes for RNA polymerase alpha  
272 subunit, the amino acid valine was changed to alanine at position 287 (V287A)  
273 and in the *yggW* gene, encoding for putative oxidoreductase, the aspartate in  
274 position 108 was changed to glutamate (D108E).  
275 To validate the role of these mutations we re-introduced these changes to the wt  
276 background using CRMAGE technique<sup>23</sup>. Mutations were made both as single  
277 changes and in combination and the resulting strains were tested in growth  
278 resumption assay. BW-V287A strain is more sensitive to lower MP  
279 concentrations (compared to wt), but the MP effect is dampened at higher  
280 concentrations (Figure 5b). BW-D108E is more similar to wt and the double  
281 mutant strain combines the two phenotypes displaying a MP effect with dual  
282 maxima. V287A and D108E mutations can recapitulate the BW1.3 phenotype and  
283 are thus the cause of the change in MP sensitivity.  
284

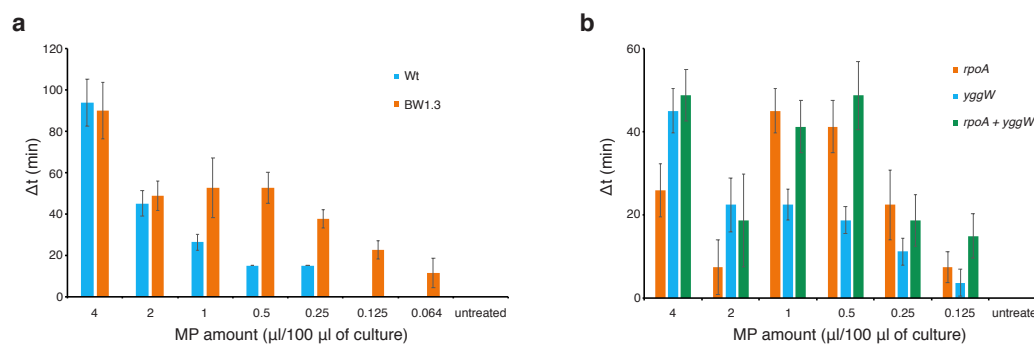

285  
286  
287 **Figure 5. Point mutations in *rpoA* and *yggW* genes alter MP sensitivity. a.**  
288 **The strain BW1.3 has an altered sensitivity to MPs. b. Point mutations in *rpoA***  
289 **and *yggW* genes are responsible for change in MP sensitivity. The average of**  
290 **three biological replicates is shown, error bars indicate standard error of the**  
291 **mean.**  
292  
293  
294  
295  
296  
297

## 298 Discussion

299

300 Dormant bacteria need to monitor their environment in order to detect possible  
301 growth substrates. Being ready for all possible ones all the time would be  
302 energetically demanding and could deplete the last energy reserves of dormant  
303 cells leading to cell death. Growth of other microbes is certainly a sign of  
304 favorable environment so detecting others' growth by some cue could substitute  
305 for tracking many possible growth substrates. Here we identify cell wall derived  
306 MPs as such cue that can induce growth resumption of dormant cells. We show  
307 that in addition to their role as a germination signal for spores<sup>17</sup>, MPs from both  
308 Gram-negative and Gram-positive bacteria can induce growth resumption of *E.*  
309 *coli* and *P. aeruginosa*. The sugar – peptide bond is a crucial structural element  
310 for this activity and the detection of MPs by dormant bacteria does not utilize the  
311 known MP recycling pathway.

312

313 Peptidoglycan hydrolase activity and concurrent solubilization of PG fragments  
314 occurs during cell growth<sup>24</sup>. Both Gram-positive and Gram-negative bacteria  
315 have recycling systems that are able to recover some of the released fragments  
316 back to the cytoplasm and reuse them<sup>18,19</sup>. Some of the solubilized products are,  
317 however, released to external environment and thus become a cue of cell growth  
318 and division. Competing bacteria can also pick up this cue, so it makes sense to  
319 curb MP shedding. MP recycling system in *E. coli* is able to work efficiently so  
320 that only 6 – 8% of generated MPs are lost at cell division<sup>20</sup>. Given that PG  
321 represents only 2% of cell mass the recycling system does not grant a large  
322 energetic advantage and it has been speculated that it has perhaps other specific  
323 benefit<sup>25,18</sup>. Restricting the spread of MPs as a cue for growth-supporting  
324 environment could certainly be one.

325

326 A scout theory has been proposed as a way for limited population of cells to  
327 survive long dormancy while constantly scanning their environment for  
328 favorable conditions<sup>26</sup>. In dormant population some cells randomly exit  
329 dormancy and actively scan their environment. If growth is impossible the cell  
330 dies after exhausting its energy reserves. However, if the environment supports  
331 growth the cell starts to multiply and can signal its siblings to “wake up” and also  
332 start growing. MPs certainly fit the role of such signal or cue, although their  
333 production seems more unavoidable rather than induced by specific conditions.

334

335 MPs act as a germination signal for *Bacillus* spores<sup>17</sup>. In *Bacillus* they bind to and  
336 activate a eukaryotic-like serine-threonine kinase PrkC. This kinase is shown to  
337 phosphorylate a two-component system WalRK<sup>27</sup>, that further controls many  
338 genes associated with cell wall metabolism. Mycobacteria have several PrkC  
339 homologs, of which PknB is essential for growth<sup>28</sup> and can bind PG fragments<sup>29</sup>.  
340 However, PrkC family of proteins is restricted to Gram-positives and *E. coli* or  
341 other Gram-negatives do not contain a detectable homolog of PrkC. MP effect in  
342 *E. coli* is not facilitated by MP recycling system either, as eliminating the key  
343 components of this pathway did not affect the growth resumption effect of MPs  
344 (data not shown).

345

346 Despite our efforts we were not able to determine a bona fide receptor for MPs in  
347 *E. coli*. However, we identified a mutant with altered behavior in response to MPs  
348 (Figure 5). A strain carrying single amino acid substitution in the *rpoA* gene  
349 (V287A) has a muffled response at the higher MP concentrations, but increased  
350 sensitivity at lower concentrations. *rpoA* encodes for RNA polymerase alpha  
351 subunit and the region around the position 287 has been implicated in binding to  
352 transcriptional activators. Mutating valine 287 to alanine was shown to alter the  
353 interaction between RNA Pol alpha subunit and CRP<sup>30</sup>, increase the FNR-  
354 dependent transcription<sup>31</sup>, and decrease the phage lambda CI-dependent<sup>32</sup> and  
355 MelR-dependent<sup>33</sup> transcription. Correct transcriptional response seems to be  
356 necessary for wt-like response to MPs. D108E mutation in *yggW* gene, a putative  
357 oxidoreductase, have much milder effect on growth resumption.

358  
359 The fact that both Gram-negative and Gram-positive bacteria resuscitate in  
360 response to PG derived fragments, but detect them through different receptors is  
361 an example of convergent evolution. It underlines the importance of keeping  
362 track of microbial activity in surroundings by monitoring soluble MPs, as two  
363 different detection systems have independently evolved for that function. In  
364 addition, eukaryotes have several PG receptors and in mammals NOD1 and  
365 NOD2 are used by immune cells to detect the presence of bacteria<sup>34</sup>. This further  
366 emphasizes the importance of MPs as a telltale sign of active bacteria that  
367 different organisms have evolved to detect.

## 368 369 **Materials and methods**

### 370 371 **Bacterial strains and plasmids**

372  
373 *E. coli* strain BW25113 (F-,  $\Delta(\text{araD-araB})567$ ,  $\Delta\text{lacZ4787}>::\text{rrnB-3}$ ),  $\lambda$ -, *rph-1*,  
374  $\Delta(\text{rhaD- rhaB})568$ , *hsdR514*) and its derivatives were used in all *E. coli*  
375 experiments. Plasmids pET-GFP and pBAD-Crimson<sup>10</sup> were used to induce GFP  
376 and E2-Crimson expression respectively. In addition, *P. aeruginosa* strain PAO1  
377 was used.

### 378 379 **Growth resumption assay**

380  
381 In the case of *E. coli* cells were grown in MOPS medium supplemented with 0.1%  
382 glycerol for 4 – 5 days in 2 mL volume in test tubes. Cells were centrifuged for 1  
383 min at 13,200 rcf, supernatant removed and the pellet was resuspended in equal  
384 amount of sterile deionized water. Cells were centrifuged again and resuspended  
385 in the same amount of deionized water. Cell suspension was diluted 1:20 in fresh  
386 MOPS 0.1% gluconate (or 0.1% glycerol, data not shown) and transferred to 96-  
387 well flat bottom plate, 100  $\mu\text{L}$  per well. MPs/PG was added to the first column on  
388 the plate and serial dilution was made with two-fold steps. In the case of  
389 conditioned medium the first column contained 1:1 mixture of fresh and  
390 conditioned medium. Plate was incubated in Biotek SynergyMx plate reader at  
391 37 C degrees with constant shaking. Optical density at 600 nm was measured in  
392 every 15 min. during the course of experiment. In the case of *P. aeruginosa* cells  
393 were grown in MOPS 0.1% glucose for 5 days and seeded on a 96-well plate in  
394 the same medium.

395

## 396 **Flow cytometry analysis**

397

398 *E. coli* cells with pBAD-Crimson and pET-GFP plasmids were grown in MOPS  
399 0.1% glycerol containing chloramphenicol (25 µg/mL), kanamycin (25 µg/mL)  
400 and arabinose (1 mM) to induce E2-Crimson. After 4 day incubation in stationary  
401 phase cells were washed with water and resuspended either in fresh MOPS 0.1%  
402 gluconate or in conditioned medium containing 1 mM IPTG to induce GFP  
403 expression. Cells were grown at 37 °C on shaker, samples for flow cytometry  
404 were taken at the times indicated, mixed with equal amount of 30% glycerol in  
405 PBS and stored at -70 °C pending analysis.

406 Flow cytometry analysis was carried out as described <sup>10</sup> using LSR II (BD  
407 Biosciences) with blue (488 nm) and red (638 nm) lasers. The detection  
408 windows for GFP and E2-Crimson were 530 ± 15 nm and 660 ± 10 nm  
409 respectively. Flow cytometry data was analyzed using FloJo software package. At  
410 least 20,000 events were collected for every sample.

411

## 412 **Peptidoglycan isolation**

413

414 PG was purified as described <sup>17</sup>. Briefly, cells were grown overnight in LB (*P.*  
415 *aeruginosa*, *B. subtilis*, *E. faecalis*) or MOPS 0.2 % glycerol (*E. coli*). 100 ml of  
416 bacterial culture was centrifuged, washed twice with deionized water (100 ml  
417 and 15 ml) and resuspended in 4 ml of 4% SDS. The suspension was boiled for  
418 30 min, incubated at room temperature overnight and boiled again for 10 min in  
419 the next day. SDS-insoluble material was collected by centrifugation at 13,200 rcf  
420 for 15 min at room temperature. Pellet was washed four times with deionized  
421 water, one time in 12.5 mM Na-phosphate buffer (pH 5.8) and resuspended in 1  
422 ml of the same buffer. The resuspended PG was digested with mutanolysin  
423 (Sigma) by adding 1kU of enzyme to 0.7 ml of PG suspension and incubating the  
424 mixture at 37 °C overnight with constant shaking. On the next day mutanolysin  
425 was inactivated at 80 °C for 20 min.

426

## 427 **Detection of muropeptides in conditioned medium by UPLC-MS**

428

429 Filtered fresh and conditioned media were dried and resuspended in deionized  
430 water (final samples were 10 times more concentrated than the original medium),  
431 boiled for 20 min and centrifuged at 14,000 rpm for 15 min to precipitate proteins  
432 and insoluble material before UPLC-MS injection. MS data were obtained by using  
433 MS<sup>e</sup> acquisition mode. These data were processed and a built compound library in  
434 UNIFI that contains the structure of several anhydro and non-reduced forms of  
435 *mDAP*-type mono and disaccharide peptides was used for the search of MPs. For  
436 building the compound library the molecular structure of MPs was obtained by  
437 using ChemSketch ([www.acdlabs.com](http://www.acdlabs.com)). After automatic-compound identification,  
438 structure of the matched components was verified by search of corresponding  
439 fragment ions and comparison of the mass spectra with MS/MS data previously  
440 obtained from standard MPs. The area of the MS-chromatogram obtained for each  
441 identified MP was considered as the quantitative value.

442



443 UPLC-MS was performed on an UPLC system interfaced with a Xevo G2/XS Q-  
444 TOF mass spectrometer (Waters Corp.). Chromatographic separation was  
445 achieved using an ACQUITY UPLC-BEH C18 Column (Waters Corp. 2.1 mm x 150  
446 mm; 1.7µm particle size) heated at 45 °C. As mobile phases 0.1% formic acid in  
447 Milli-Q water (buffer A) and 0.1% formic acid in acetonitrile (buffer B) were used  
448 and the gradient of buffer B was set as follows: 0-3 min 5%, 3-6 min 5-6.8%, 6-  
449 7.5 min 6.8-9%, 7.5-9 min 9-14%, 9-11 min 14-20%, 11-12 min hold at 20% with  
450 a flow rate of 0.175 ml/min; 12-12.10 min 20-90%, 12.1-13.5 min hold at 90%,  
451 13.5-13.6 min 90-2%, 13.6-16 min hold at 2% with a flow rate of 0.3 ml/min; and  
452 then 16-18 min hold at 2% with a flow rate of 0.25 ml/min. The QTOF-MS  
453 instrument was operated in positive ionization mode using the acquisition mode  
454 MS<sup>e</sup>. The parameters set for ESI were: capillary voltage at 3.0 kV, source  
455 temperature to 120 °C, desolvation temperature to 350 °C, sample cone voltage  
456 to 40 V, cone gas flow 100 L/h and desolvation gas flow 500 L/h. Mass spectra  
457 were acquired for molecules eluting only after minute 6 (due to the existence of  
458 an abundant background molecule eluting at minute 5 in both fresh and active  
459 medium) at a speed of 0.25 s/scan and the scan was in a range of 100–1600 m/z.  
460 Data acquisition and processing were performed using UNIFI software package  
461 (Waters Corp.).  
462

### 463 **Muropeptide production and isolation**

464  
465 Pure MPs were obtained through collection of HPLC (high-performance liquid  
466 chromatography) separated MP peaks. Disaccharide-tetrapeptide (M4) and  
467 disaccharide-dipeptide (M2) were collected from muramidase-digested sacculi of  
468 stationary cell cultures of *Vibrio cholerae* and *Gluconobacter oxydans* grown in LB  
469 and YPM (yeast peptone mannitol) medium respectively<sup>35</sup>. Anhydrodisaccharide-  
470 tetrapeptide (M4N) was produced by digesting *V. cholerae* stationary phase  
471 sacculi with Slt70 lytic transglycosylase<sup>35</sup>. For obtaining M3 and M3N tripeptides,  
472 M4 and M4N were digested with purified *V. cholerae* L,D-carboxypeptidase LdcV  
473 (Hernández et al., in preparation)<sup>36</sup>. Anhydromuramyl-tetrapeptides (anhNAM-  
474 P4) were obtained by digestion of M4N with a purified NagZ homolog of *V.*  
475 *cholerae* (Hernández et al., in preparation)<sup>37,38</sup>. For MP collection, reduced MPs  
476 were fractionated by reverse-phase HPLC (Waters Corp.) on an Aeris peptide  
477 column (250 × 4.6 mm; 3.6 µm particle size; Phenomenex, USA) using 0.1% of  
478 formic acid and 0.1% of formic acid in 40% of acetonitrile as organic solvents in  
479 30 minutes runs<sup>39,35</sup>. Collected fractions were dried completely and dissolved in  
480 water. The identity of individual collected MPs was confirmed by LC-MS analysis.  
481 Tripeptide Ala-γ-D-Glu-*m*DAP was purchased from AnaSpec and N-acetyl  
482 muramic acid from Sigma-Aldrich.  
483

### 484 **Screening for mutants not responding to MP**

485  
486 In order to identify genes involved in MP detection we used *E. coli* strain  
487 BW25113 carrying pET-GFP plasmid. Cells were grown into stationary phase in  
488 the presence of IPTG to induce GFP expression in MOPS 0.1% glycerol. After four  
489 days cells were washed with deionized water and diluted 1:20 into fresh MOPS  
490 0.1% gluconate containing MPs. Growth resumption was monitored by GFP  
491 dilution method and nondividing (high GFP content) cells were sorted when they

492 constituted approximately 20% of total population. Sorted cells were pooled and  
493 subjected to another round of growth resumption, this time without MP addition  
494 and no sorting. In the first round we select cells that resume growth slowly even  
495 in the presence of MPs, in the second we select for cells that resume growth with  
496 normal speed in the absence of MPs. After four rounds cells were streaked on the  
497 agar plate and individual colonies were tested in growth resumption assay. In  
498 order to identify mutations behind the phenotype we sequenced the genomes of  
499 two clones with altered MP sensitivity (BW1.2 and BW1.3) and two clones with  
500 wt-like behavior (BW1.4 and BW1.5) together with wt strain.

501

## 502 **Genome sequencing and bioinformatic analysis**

503

504 The genomes were sequenced using MiSeq platform (Illumina). Wild-type isolate  
505 (BW25113) was assembled with SPAdes (version 3.10.1)<sup>40</sup> and used as a  
506 reference genome. Sequencing reads from isolates BW1.2, BW1.3, BW1.4 and  
507 BW1.5 were mapped to BW25113 using bowtie2 (version 2.0.0-beta7)<sup>41</sup>. SNPs  
508 and small indels for each isolate were called using Samtools (version 1.9)<sup>42</sup>.  
509 Retrieved variations were further filtered to keep only those that were present in  
510 BW1.2 and BW1.3 but not in BW1.4 and BW1.5 isolates compared to the wild  
511 type. Variations in protein coding areas were verified using Sanger sequencing.  
512 Unmapped reads from each isolate BW1.2-BW1.5 were assembled *de novo* to  
513 ensure that we were not missing other potential phenotype related sequences  
514 that were not presented in wild-type reference assembly.

515

## 516 **Genome modification**

517

518 Two point mutations identified in selection were re-introduced into wt genome  
519 using CRMAGE<sup>23</sup>. This method combines mutation introduction by  
520 oligonucleotide (recombineering) and counterselection against wt using CRISPR-  
521 Cas9. The presence of mutations was verified by Sanger sequencing.

522

## 523 **Acknowledgements**

524

525 This work was supported by Estonian Research Council (grant PRG335), and by  
526 the European Regional Development Fund (through the Centre of Excellence in  
527 Molecular Cell Engineering). Research in the Cava lab is supported by MIMS, the  
528 Knut and Alice Wallenberg Foundation (KAW), the Swedish Research Council and  
529 the Kempe Foundation. AB and MR were funded by institutional grant IUT34-11  
530 from the Estonian Ministry of Education and Research and the EU ERDF grant No.  
531 2014-2020.4.01.15-0012 (Estonian Center of Excellence in Genomics and  
532 Translational Medicine).

533

## 534 **Author contributions**

535

536 AJ, FC and TT conceived and designed the study. AJ, KV, RM and MP performed  
537 microbiological experiments, SBH analyzed and purified MPs. AB and MR  
538 performed genome assembly and bioinformatic analysis. AJ, SBH, FC and TT  
539 wrote the manuscript.

540



541 **Competing interests**

542

543 The authors declare no competing interests.

544

545

546 **References**

547

548 1. Higgins, D. & Dworkin, J. Recent progress in *Bacillus subtilis* sporulation.  
549 *FEMS Microbiol. Rev.* **36**, 131–48 (2012).

550 2. Nyström, T. Stationary-Phase Physiology. *Annu. Rev. Microbiol.* **58**, 161–  
551 181 (2004).

552 3. Liu, K., Bittner, A. N. & Wang, J. D. Diversity in (p)ppGpp metabolism and  
553 effectors. *Curr. Opin. Microbiol.* **24**, 72–79 (2015).

554 4. Gaca, A. O., Colomer-Winter, C. & Lemos, J. A. Many means to a common  
555 end: the intricacies of (p)ppGpp metabolism and its control of bacterial  
556 homeostasis. *J. Bacteriol.* **197**, 1146–56 (2015).

557 5. Hauryluk, V., Atkinson, G. C., Murakami, K. S., Tenson, T. & Gerdes, K.  
558 Recent functional insights into the role of (p)ppGpp in bacterial  
559 physiology. *Nat. Rev. Microbiol.* **13**, 298–309 (2015).

560 6. Jöers, A., Kaldalu, N. & Tenson, T. The frequency of persisters in  
561 *Escherichia coli* reflects the kinetics of awakening from dormancy. *J.*  
562 *Bacteriol.* **192**, 3379–3384 (2010).

563 7. Levin-Reisman, I. *et al.* Automated imaging with ScanLag reveals  
564 previously undetectable bacterial growth phenotypes. *Nat. Methods* **7**,  
565 737–9 (2010).

566 8. Ma, C. *et al.* Energy production genes *sucB* and *ubiF* are involved in  
567 persister survival and tolerance to multiple antibiotics and stresses in  
568 *Escherichia coli*. *FEMS Microbiol. Lett.* **303**, 33–40 (2010).

569 9. Pu, Y. *et al.* ATP-Dependent Dynamic Protein Aggregation Regulates  
570 Bacterial Dormancy Depth Critical for Antibiotic Tolerance. *Mol. Cell* **0**,  
571 (2018).

572 10. Jöers, A. & Tenson, T. Growth resumption from stationary phase reveals  
573 memory in *Escherichia coli* cultures. *Sci. Rep.* **6** VN-re, 24055 (2016).

574 11. Van den Bergh, B., Fauvart, M. & Michiels, J. Formation, physiology,  
575 ecology, evolution and clinical importance of bacterial persisters. *FEMS*  
576 *Microbiol. Rev.* **41**, 219–251 (2017).

577 12. Mulcahy, L. R., Burns, J. L., Lory, S. & Lewis, K. Emergence of *Pseudomonas*  
578 *aeruginosa* strains producing high levels of persister cells in patients with  
579 cystic fibrosis. *J. Bacteriol.* **192**, 6191–6199 (2010).

580 13. Schumacher, M. A. *et al.* HipBA-promoter structures reveal the basis of  
581 heritable multidrug tolerance. *Nature* **524**, 59–64 (2015).

582 14. Mukamolova, G. V., Kaprelyants, a S., Young, D. I., Young, M. & Kell, D. B. A  
583 bacterial cytokine. *Proc. Natl. Acad. Sci. U. S. A.* **95**, 8916–8921 (1998).

584 15. Pascoe, B. *et al.* Dormant Cells of *Staphylococcus aureus* Are Resuscitated  
585 by Spent Culture Supernatant. *PLoS One* **9**, e85998 (2014).

586 16. Setlow, P., Wang, S. & Li, Y.-Q. Germination of Spores of the Orders  
587 *Bacillales* and *Clostridiales*. *Annu. Rev. Microbiol.* **71**, 459–477 (2017).

588 17. Shah, I. M., Laaberki, M.-H. H., Popham, D. L. & Dworkin, J. A eukaryotic-like  
589 {Ser/Thr} kinase signals bacteria to exit dormancy in response to

- 590 peptidoglycan fragments. *Cell* **135**, 486–496 (2008).
- 591 18. Park, J. T. & Uehara, T. How bacteria consume their own exoskeletons  
592 (turnover and recycling of cell wall peptidoglycan). *Microbiol. Mol. Biol.*  
593 *Rev.* **72**, 211–27, table of contents (2008).
- 594 19. Reith, J. & Mayer, C. Peptidoglycan turnover and recycling in Gram-positive  
595 bacteria. *Appl. Microbiol. Biotechnol.* **92**, 1–11 (2011).
- 596 20. Goodell, E. W. & Schwarz, U. Release of cell wall peptides into culture  
597 medium by exponentially growing *Escherichia coli*. *J. Bacteriol.* **162**, 391–  
598 397 (1985).
- 599 21. Vollmer, W., Blanot, D. & De Pedro, M. A. Peptidoglycan structure and  
600 architecture. *FEMS Microbiol. Rev.* **32**, 149–167 (2008).
- 601 22. Desmarais, S. M., De Pedro, M. A., Cava, F. & Huang, K. C. Peptidoglycan at  
602 its peaks: how chromatographic analyses can reveal bacterial cell wall  
603 structure and assembly. *Mol. Microbiol.* **89**, 1–13 (2013).
- 604 23. Ronda, C., Pedersen, L., Sommer, M. O. A. & Nielsen, A. {CRMAGE:}  
605 {CRISPR} Optimized {MAGE} Recombineering. *Sci Reports* **6**, 19452  
606 (2016).
- 607 24. Höltje, J. V. Growth of the stress-bearing and shape-maintaining murein  
608 sacculus of *Escherichia coli*. *Microbiol. Mol. Biol. Rev.* **62**, 181–203 (1998).
- 609 25. Park, J. T. Why does *Escherichia coli* recycle its cell wall peptides? *Mol.*  
610 *Microbiol.* **17**, 421–426 (1995).
- 611 26. Epstein, S. S. Microbial awakenings. TL - 457. *Nature* **457 VN-**, 1083  
612 (2009).
- 613 27. Libby, E. A., Goss, L. A. & Dworkin, J. The {Eukaryotic-Like} {Ser/Thr}  
614 Kinase {PrkC} Regulates the Essential {WalRK} {Two-Component} System  
615 in *Bacillus subtilis*. *{PLoS} Genet.* **11**, e1005275 (2015).
- 616 28. Fernandez, P. *et al.* The Ser/Thr protein kinase PknB is essential for  
617 sustaining mycobacterial growth. *J. Bacteriol.* **188**, 7778–84 (2006).
- 618 29. Mir, M. *et al.* The Extracytoplasmic Domain of the Mycobacterium  
619 tuberculosis Ser/Thr Kinase PknB Binds Specific Muropeptides and Is  
620 Required for PknB Localization. *PLoS Pathog.* **7**, e1002182 (2011).
- 621 30. Savery, N. J. *et al.* Determinants of the C-terminal domain of the  
622 *Escherichia coli* RNA polymerase alpha subunit important for  
623 transcription at class I cyclic AMP receptor protein-dependent promoters.  
624 *J. Bacteriol.* **184**, 2273–80 (2002).
- 625 31. Weber, K. D., Vincent, O. D. & Kiley, P. J. Additional determinants within  
626 *Escherichia coli* FNR activating region 1 and RNA polymerase alpha  
627 subunit required for transcription activation. *J. Bacteriol.* **187**, 1724–31  
628 (2005).
- 629 32. Kedzierska, B. *et al.* The C-terminal domain of the *Escherichia coli* RNA  
630 polymerase alpha subunit plays a role in the CI-dependent activation of  
631 the bacteriophage lambda pM promoter. *Nucleic Acids Res.* **35**, 2311–20  
632 (2007).
- 633 33. Grainger, D. C., Belyaeva, T. A., Lee, D. J., Hyde, E. I. & Busby, S. J. W.  
634 Transcription activation at the *Escherichia coli* melAB promoter:  
635 interactions of MelR with the C-terminal domain of the RNA polymerase  $\alpha$   
636 subunit. *Mol. Microbiol.* **51**, 1311–1320 (2004).
- 637 34. Wolf, A. J. & Underhill, D. M. Peptidoglycan recognition by the innate  
638 immune system. *Nat. Rev. Immunol.* **18**, 243–254 (2018).

- 639 35. Espaillet, A. *et al.* Chemometric Analysis of Bacterial Peptidoglycan Reveals  
640 Atypical Modifications That Empower the Cell Wall against Predatory  
641 Enzymes and Fly Innate Immunity. *J. Am. Chem. Soc.* **138**, 9193–9204  
642 (2016).
- 643 36. Templin, M. F., Ursinus, A. & Höltje, J. V. A defect in cell wall recycling  
644 triggers autolysis during the stationary growth phase of *Escherichia coli*.  
645 *EMBO J.* **18**, 4108–17 (1999).
- 646 37. Cheng, Q., Li, H., Merdek, K. & Park, J. T. Molecular characterization of the  
647 beta-N-acetylglucosaminidase of *Escherichia coli* and its role in cell wall  
648 recycling. *J. Bacteriol.* **182**, 4836–40 (2000).
- 649 38. Vötsch, W. & Templin, M. F. Characterization of a beta -N-  
650 acetylglucosaminidase of *Escherichia coli* and elucidation of its role in  
651 muropeptide recycling and beta -lactamase induction. *J. Biol. Chem.* **275**,  
652 39032–8 (2000).
- 653 39. Glauner, B. Separation and quantification of muropeptides with high-  
654 performance liquid chromatography. *Anal. Biochem.* **172**, 451–464 (1988).
- 655 40. Bankevich, A. *et al.* SPAdes: a new genome assembly algorithm and its  
656 applications to single-cell sequencing. *J. Comput. Biol.* **19**, 455–77 (2012).
- 657 41. Langmead, B. & Salzberg, S. L. Fast gapped-read alignment with Bowtie 2.  
658 *Nat. Methods* **9**, 357–359 (2012).
- 659 42. Li, H. *et al.* The Sequence Alignment/Map format and SAMtools.  
660 *Bioinformatics* **25**, 2078–2079 (2009).
- 661
